## Correction: Multiparametric imaging using $^{18}\text{F}$ -FDG PET/CT heterogeneity parameters and functional MRI techniques: prognostic significance in patients with primary advanced oropharyngeal or hypopharyngeal squamous cell carcinoma treated with chemoradiotherapy

Sheng-Chieh Chan<sup>1,2,\*</sup>, Nai-Ming Cheng<sup>2,3,\*</sup>, Chia-Hsun Hsieh<sup>4</sup>, Shu-Hang Ng<sup>5,6</sup>, Chien-Yu Lin<sup>7</sup>, Tzu-Chen Yen<sup>2,3</sup>, Cheng-Lung Hsu<sup>4</sup>, Hung-Ming Wan<sup>4</sup>, Chun-Ta Liao<sup>8</sup>, Kai-Ping Chang<sup>8</sup> and Jiun-Jie Wang<sup>5,6</sup>

<sup>1</sup> Department of Nuclear Medicine, Keelung Chang Gung Memorial Hospital, Keelung, Taiwan

<sup>2</sup> Molecular Imaging Center, Linkou Chang Gung Memorial Hospital and Chang Gung University, Taoyuan, Taiwan

<sup>3</sup> Department of Nuclear Medicine, Linkou Chang Gung Memorial Hospital and Chang Gung University, Taoyuan, Taiwan

<sup>4</sup> Department of Internal Medicine, Division of Medical Oncology, Linkou Chang Gung Memorial Hospital and Chang Gung University, Taoyuan, Taiwan

<sup>5</sup> Department of Diagnostic Radiology, Linkou Chang Gung Memorial Hospital and Chang Gung University, Taoyuan, Taiwan

<sup>6</sup> Department of Medical Imaging and Radiological Sciences, Chang Gung University, Taoyuan, Taiwan

<sup>7</sup> Department of Radiation Oncology, Linkou Chang Gung Memorial Hospital and Chang Gung University, Taoyuan, Taiwan

<sup>8</sup> Department of Otorhinolaryngology, Linkou Chang Gung Memorial Hospital and Chang Gung University, Taoyuan, Taiwan

\* These authors have contributed equally to this work

**Published:** February 09, 2018

**Copyright:** Chan et al. This is an open-access article distributed under the terms of the Creative Commons Attribution License 3.0 (CC BY 3.0), which permits unrestricted use, distribution, and reproduction in any medium, provided the original author and source are credited.

**This article has been corrected:** the 5<sup>th</sup> affiliation citation has been included to Dr. Jiun-Jie Wang along with affiliation 6<sup>th</sup>.

Original article: Oncotarget. 2017; 8:62606-62621. <https://doi.org/10.18632/oncotarget.15904>
